# Low and Borderline Ankle Brachial Index is Associated with Intracranial Aneurysms – A Retrospective Cohort Study

Dan Laukka<sup>1,2</sup>, Essi Kangas<sup>3</sup>, Aino Kuusela<sup>3</sup>, Jussi Hirvonen<sup>5,6</sup>, Tiia Rissanen<sup>4</sup>, Melissa Rahi<sup>1,2</sup>, Juri Kivelev<sup>1,2</sup>, Ville Rantasalo<sup>3</sup>, Jaakko Rinne<sup>1,2</sup>, Harri Hakovirta<sup>3,8</sup>

<sup>1</sup>Department of Neurosurgery, Neurocenter, Turku University Hospital, Turku, Finland

<sup>2</sup>Clinical Neurosciences, University of Turku, Turku, Finland

<sup>3</sup>Department of Surgery, University of Turku, Turku, Finland.

<sup>4</sup>Department of Clinical Medicine, Biostatistics, University of Turku, Turku, Finland

<sup>5</sup>Department of Radiology, Turku University Hospital and University of Turku, Turku, Finland

<sup>6</sup>Department of Radiology, University of Tampere, Tampere, Finland

<sup>7</sup>Department of Biostatistics, University of Turku and Turku University Hospital, Turku, Finland

<sup>8</sup>Department of Surgery, Satasairaala, Pori, Finland.

## Correspondence:

Dan Laukka, MD, PhD

Department of Neurosurgery and Division of Clinical Neurosciences

Turku University Hospital and University of Turku,

Hämeentie 11,

Turku, 20521, Finland.

Email: [djalau@utu.fi](mailto:djalau@utu.fi)

**Short Title:** Ankle Brachial Index and Intracranial Aneurysms

**Number of Figures:** 1

**Number of Tables:** 4

**Total Word Count:** 4258

## Abstract

### Background and Aims

A low ankle-brachial index (ABI) is associated with a higher risk of cardiovascular diseases, stroke, and systemic inflammation. Intracranial aneurysms (IAs) share similar risk factors with other cardiovascular diseases. However, the association between low ABI and IAs lacks sufficient investigation.

### Methods

This retrospective study reviewed 2751 patients who had ABI measurements at a tertiary hospital from January 2011 to December 2013. Patients with available cerebrovascular imaging or a diagnosis of ruptured IA were included in the study (n=776) to examine the association between ABI and saccular IAs. The patients were classified into four groups: low ABI ( $\leq 0.9$ , n=464), borderline ABI (0.91-0.99; n=47), high ABI ( $> 1.4$ , n=57), and normal ABI (1.00-1.40; n=208).

### Results

The prevalence of IAs was 20.3% (18.1% unruptured IAs) in the low ABI group, 14.9% (12.8% unruptured IAs) in the borderline ABI group, 7.0% (5.3% unruptured IAs) in the high ABI group, and 2.4% (1.9% unruptured IAs) in the normal ABI group ( $p < 0.001$ ). Sex- and age-adjusted multinomial regression, including clinically relevant variables, revealed that low ABI (odds ratio [OR], 11.33; 95% confidence interval [CI], 4.08-31.51;  $p < 0.001$ ) and borderline ABI (0.91-0.99) (OR, 7.13; 95% CI, 1.91-26.63;  $p = 0.004$ ) were the only variables significantly associated with unruptured IAs.

### Conclusions

The prevalence of unruptured IAs was 9-fold higher in the low ABI group and nearly 7-fold higher in the borderline ABI group when compared to the normal ABI group. ABI measurements could be clinically relevant for identifying individuals at higher risk of IAs and may help guide screening and preventive strategies.

## Keywords

Intracranial aneurysm  
Ankle-brachial index  
Risk factors

## 1. Introduction

The prevalence of unruptured intracranial aneurysms (IAs) in the general population is approximately 3%,<sup>1</sup> and the annual incidence of aneurysmal subarachnoid hemorrhage is approximately 8 per 100 000<sup>2</sup>. Hypertension and smoking are the most important modifiable risk factors for IAs.<sup>3,4</sup> Higher atherosclerotic burden may be associated with an increased risk of IAs<sup>5,6</sup>, and ruptured IAs may be linked to excess mortality due to cardiovascular diseases<sup>7,8</sup>.

The ankle-brachial index (ABI) is an easily available method for confirming the diagnosis of peripheral artery disease. An ABI  $\leq 0.9$  and  $> 1.4$  is considered abnormal, whereas ABIs falling within a range of 0.91-0.99 are considered borderline.<sup>9</sup> A low ABI ( $\leq 0.9$ ) and a borderline ABI are associated with an increased risk of cardiovascular diseases and stroke.<sup>10,11</sup> ABI can also be used to assess cardiovascular disease risk independently of other risk factors (Stone et al., 2022).<sup>12</sup> A low ABI may be associated with an increase in the risk of abdominal aortic aneurysms,<sup>13,14</sup> whereas aortic aneurysms may increase the risk of cerebral aneurysms<sup>15</sup> and vice versa<sup>16</sup>.

Despite the known predictive value of ABI for cardiovascular disease and potentially for aortic aneurysms, there have been no published studies that have investigated the association between ABI and IAs as far as the authors are aware. In this study, we present an association between ABI and IAs.

## 2. Methods

The study was approved by the institutional review board at Turku University Hospital, Finland. Patient consent was not required because of the retrospective nature of the study.

### 2.1. Population

All consecutive patients (n=2757) who had ABI determined in the vascular laboratory at the Department of Clinical Physiology, Turku University Hospital, South-West Finland, from 1 January 2011 to 31 December 2013 were reviewed retrospectively. The vascular laboratory provides non-invasive pressure measurement that cover the hospital region catchment area population of 480 000 inhabitants.

Radiological examinations and electronic patient charts were reviewed until 1 January 2023. Of the 2757 patients, 776 with available imaging studies (MR angiography, CT angiography or digital subtraction angiography) or a history of ruptured IA were included.

### 2.2. Baseline measurements

The following variables were obtained from the electronic patient records: hypertension (if the patient had diagnosed hypertension and/or anti-hypertensive medication); hypercholesterolemia (if the patient had diagnosed hypercholesterolemia and/or medication for hypercholesterolemia); diabetes type 1; diabetes type 2 (diagnosed diabetes type 2 and/or medication for diabetes type 2); coronary artery disease (if the patient had diagnosed coronary artery disease, prior artery bypass surgery or angioplasty, or prior myocardial infarction); malignancy (prior diagnosis of any malignancy); chronic obstructive pulmonary disease (if the patient had diagnosed chronic

obstructive pulmonary disease); malignancy (if the patient had a history of any malignancy); rheumatoid arthritis (if the patient had diagnosed rheumatoid arthritis); varicose ulcer (if the patient had diagnosed varicose ulcer).

Qualified sonographers measured ankle and brachial systolic blood pressure ipsilaterally for both sides of the patient using the oscillometric method. The ABI was calculated as the ratio of the ankle systolic blood pressure divided by the highest systolic blood pressure of the arm ipsilaterally. The lower value of the bilateral ABI determinations was used for analysis.

One of the authors (D.L., Consultant Neurosurgeon) evaluated all cerebrovascular imaging studies for intracranial aneurysms (IAs). A neuroradiologist, with over 10 years of experience, evaluated every IA to confirm the diagnosis. Any disagreements in the evaluations between the neurosurgeon and neuroradiologist were resolved through consensus.

IAs that were saccular and larger than or equal to 2 mm in size and located intracranially were considered as an IA.

According to the Bouthillier classification<sup>17</sup>, aneurysms located distal to the clinoid segment (C5) were defined as intradural, whereas aneurysms located in the intracavernous segment (C4) were classified as extradural. Aneurysms in and proximal to the C4 segment were not analyzed. Unruptured IAs located in the internal carotid artery (ICA) were categorized as follows: ophthalmic artery, posterior communicating artery, anterior choroidal artery, and ICA bifurcation aneurysms. Middle cerebral artery aneurysms (MCA) were categorized as M1-segment, M1 bifurcation, M1/M2 bifurcation, M2, and M3-M4 segments. Anterior cerebral artery aneurysms (ACA) were categorized as A1-segment, anterior communicating artery, and distal ACA aneurysms. Finally, posterior circulation artery aneurysms (PCA) were categorized as posterior cerebral artery P1, P2, and P3, basilar tip, basilar trunk, superior cerebellar artery, posterior inferior cerebellar artery, and anterior inferior cerebellar artery.

## 2.4. Statistical methods

The primary outcome examined was the prevalence of both unruptured and ruptured IAs, either together or separately.

Patients were classified into four main groups based on their ABI values as follows: low ABI ( $\leq 0.9$ ), borderline ABI (0.91-0.99), normal ABI (1.0-1.4), and high ABI ( $> 1.4$ ). Furthermore, patients were categorized into three groups, namely: those with ruptured IAs, those with unruptured IAs, and those without IAs.

Associations between the different groups were calculated using the chi-square test for categorical data. For continuous data, Kruskal-Wallis test were used for nonparametric data and one way ANOVA for normally distributed data.

Multinomial regression analyses were performed to evaluate the association of ABI groups with the IAs. In the first set of calculations, adjustments were made for clinically relevant variables. In the second set of calculations, only variables that showed statistically significant values ( $p < 0.05$ ) in the univariate analysis were included in the multivariate analysis. Similarly, the associations between ABI groups and covariates were calculated. Both models were adjusted for sex and age.

Continuous data are expressed as either the mean  $\pm$  standard deviation (SD) or the median interquartile range (IQR) depending on their distribution. Missing data were excluded from the analysis.

Data were analyzed using the JMP16 statistics package (SAS Institute, Cary, NC, USA). A p-value below 0.05 was considered statistically significant.

### 3. Results

Of the 776 included individuals 464 (59.8%) had a low ABI ( $\leq 0.9$ ), 47 (6.1%) had a borderline ABI (0.91-0.99), 57 (7.3%) had a high ABI ( $> 1.4$ ), and 208 (26.8%) had a normal ABI (1.0-1.4). Regarding cerebrovascular imaging analyses, there were no disagreements regarding the diagnosis of IAs between the two interpreters.

#### 3.1. Associations of ABI groups with intracranial aneurysms

**Table 1** presents the main baseline demographics of patients and intracranial aneurysms (IAs) categorized by ABI groups. **Figure 1** presents the prevalence of unruptured and ruptured IAs by ABI groups.

The prevalence of unruptured IAs was 18.1% in the low ABI ( $\leq 0.9$ ) group, 12.8% in the borderline ABI (0.91-0.99) group, 5.3% in the high ABI ( $> 1.4$ ) group, and 1.9% in the normal ABI (1.0-1.4) group ( $p < 0.001$ ).

Within the low ABI ( $\leq 0.9$ ) group, 2.2% had ruptured IAs, whereas in the borderline ABI (0.91-0.99) group, 2.1% had ruptured IAs. In the high ABI ( $> 1.4$ ) group, 1.8% had ruptured IAs, and in the normal ABI (1.0-1.4) group, 0.5% had ruptured IAs ( $p = 0.277$ ).

**Table 2** displays the main baseline demographics of patients categorized by IA presentation. The median ABI was 0.59 (IQR 0.45-0.75) in patients with unruptured IAs, 0.57 (IQR 0.51-0.79) in patients with ruptured IAs, and 0.80 (IQR 0.53-1.13) in patients without unruptured IAs ( $p < 0.001$ ).

Multinomial regression analyses, adjusted for age, sex, and clinically significant variables (**Table 3, Model 1**), revealed that low ABI ( $\leq 0.9$ ) (odds ratio [OR], 11.33; 95% confidence interval [CI], 4.08-31.51;  $p < 0.001$ ) and borderline ABI (0.91-0.99) (OR, 7.13; 95% CI, 1.91-26.63;  $p = 0.004$ ) were the only variables associated with unruptured IAs. Similar results were observed in the second model (**Table 3, Model 2**), which were adjusted for age, sex and statistically significant variables.

#### 3.2. Associations with ABI groups

The multinomial regression analysis revealed age (OR, 1.03; 95% CI, 1.02-1.05;  $p < 0.001$ ), chronic obstructive pulmonary disease (OR, 2.68; 95% CI, 1.43-5.01;  $p = 0.002$ ), and atrial fibrillation (OR, 0.53; 95% CI, 0.35-0.80;  $p < 0.001$ ) were associated with low ABI ( $\leq 0.9$ ). Diabetes type 1 or 2 (OR, 2.41; 95% CI, 1.26-4.61;  $p = 0.010$ ) and chronic kidney failure (OR, 3.29; 95% CI, 1.55-6.96;  $p = 0.002$ ) were associated with high ABI ( $> 1.4$ ). Female sex (OR, 1.95; 95% CI, 1.02-3.73;  $p = 0.04$ ) was associated with borderline ABI (0.91-0.99). Refer to **Table 4** for further details.

## 4. Discussion

We found a significant association between low ABI ( $\leq 0.9$ ) and between borderline ABI (0.91-0.99) with an increased risk of IAs when compared to patients with a normal ABI (1.0-1.4). The prevalence of unruptured IAs in the low ABI group ( $\leq 0.9$ ) was 18.1%, whereas the prevalence of ruptured IAs was 2.2%. Similarly, in the borderline ABI group, the prevalence of unruptured IAs was 12.8%, and ruptured IAs were found in 2.1% of the cases. In contrast, individuals with a normal ABI had a much lower prevalence of unruptured IAs (1.9%) and ruptured IAs (0.5%). This pattern of findings suggests a vastly increased risk of IAs in patients with reduced ABI.

Our findings demonstrate a 9-fold higher prevalence of unruptured IAs in the low ABI group and approximately 6-fold higher prevalence in the borderline ABI group compared to those with a normal ABI range of 1.0-1.4. Notably, the prevalence of unruptured IAs in the normal ABI group was similar to that reported in the general population.<sup>1</sup>

The prevalence of unruptured IAs in the low ABI group and borderline ABI group was similar to that observed in specific populations known to have a high risk of IAs, such as patients with polycystic kidney disease or those who have at least two first-degree relatives with IAs<sup>18</sup>. Consequently, screening for IAs is recommended in these high-risk populations.<sup>18</sup> Additionally, female smokers have been reported to exhibit a prevalence of IAs ranging from 12%<sup>19</sup> to 19%<sup>20</sup>.

Low ABI ( $\leq 0.9$ )<sup>21, 22</sup> and high ABI ( $> 1.4$ )<sup>23</sup> serve as markers of vascular disease and can predict cardiovascular mortality beyond known cardiovascular risk factors. Low ABI correlates well with other indicators of systemic atherosclerosis, such as coronary artery calcification<sup>24, 25</sup> and abdominal aortic calcification<sup>25</sup>, and it does not require imaging investigation/exploration, thus making it a readily available indicator. Moreover, IAs may be associated with an increased burden of atherosclerosis.<sup>5, 6</sup> However, the link between cardiovascular diseases and IAs has hitherto received relatively little attention.<sup>7, 8</sup>

Hypertension and smoking are shared risk factors for IAs<sup>3, 4</sup> and low/borderline ABI<sup>26</sup>. However, in our study, only low and borderline ABI both emerged as independent risk factors for IAs. Low ABI is indicative of a combination of several different risk factors,<sup>27</sup> including genetics,<sup>27</sup> and serves as an objective marker of vascular disease irrespective of other risk factors<sup>21, 22</sup>. Low ABI may be associated with systemic inflammation and endothelial dysfunction,<sup>28</sup> which could increase the risk of IAs<sup>29</sup>. Smoking is a major shared risk factor between IAs<sup>3</sup> and low ABI<sup>28</sup>, which partially explains our findings. However, chronic obstructive pulmonary disease, which is often caused by chronic smoking<sup>30</sup>, did not emerge as a risk factor for IAs in our study.

A prospective study will be required to making recommendations about IA screening based on ABI. Nonetheless, our study data show that the prevalence of IAs in low ABI and in borderline ABI groups are exceptionally high. ABI might therefore be an easy tool to screen patients who might be at a high risk for intracranial aneurysms regardless of other risk factors. Our population was too small to draw conclusions about whether there are differences between ABI groups regarding ruptured IAs. Yet despite there being no statistically significant difference, only 0.5% of patients had ruptured IAs in the normal ABI group in contrast to the low ABI and borderline ABI groups, both of which had around 2% ruptured IAs. It is intuitive to think that a population with a high prevalence of unruptured IAs may be at higher risk for ruptured IAs.

We acknowledge the limitations of our study. It is important to note that this retrospective study may introduce potential selection bias. Out of the original study population of 2757 patients, only 32% underwent cerebrovascular imaging or had ruptured IAs, and they were included in our analysis. The reasons for undergoing imaging could vary, which might lead to a possible selection bias. However, it is also worth mentioning that we had a comprehensive population, particularly for the low ABI and normal ABI groups. Despite this, the prevalence of IAs was exceptionally high in the low and borderline ABI groups, which might suggest that selection bias alone, cannot explain our findings.

Another limitation of our study is the lack of information regarding smoking status. Smoking is a well-known risk factor for both peripheral arterial disease and IAs. Unfortunately, we did not have specific information on smoking status. However, we did collect data on chronic obstructive pulmonary disease, which is often caused by heavy smoking<sup>30</sup> and can serve as an indirect indicator of smoking history.

## Conclusions

The prevalence of unruptured IAs was nearly 9-fold higher in the low ABI group and approximately 6-fold higher in the borderline ABI group compared to the normal ABI group. Notably, the prevalence of unruptured IAs in the normal ABI group was similar to that reported in the general population.

## 5. Conflict of Interest

All authors declare that they have no conflicts of interest.

## 6. Sources of Funding

This study was supported by Maire Taponen foundation (Dr. Laukka), Finnish culture foundation; Varsinais-Suomen fund (grant number 85161416) and Satakunta fund (grant numbers 75212239, 75221501) (Dr Hakovirta), a government research grant awarded to Turku University Hospital (Dr. Laukka, Dr Hakovirta and Dr. Rinne) and a government research grant awarded to Satasairaala (Pori) (Dr Hakovirta).

## 7. Author Contributions

**Dan Laukka:** designed the study, acquired the data, analyzed and interpreted the data, drafted or revised the manuscript, Funding acquisition, Formal analysis, Writing – original draft. **Essi Kangas:** revised the manuscript, acquired the data. **Aino Kuusela:** revised the manuscript, acquired the data. **Jussi Hirvonen:** revised the manuscript, drafted or revised the manuscript, acquired the data, analyzed and interpreted the data. **Tiia Rissanen:** revised the manuscript, drafted or revised the manuscript, formal analysis, analyzed and interpreted the data. **Melissa Rahi:** revised the manuscript, drafted or revised the manuscript. **Juri Kivelev:** revised the manuscript, drafted or revised the manuscript. **Ville Rantasalo:** revised the manuscript, drafted or revised the manuscript. **Jaakko Rinne:** revised the manuscript, drafted or revised the manuscript, Funding acquisition.

**Harri Hakovirta:** designed the study, acquired the data, analyzed and interpreted the data, drafted or revised the manuscript, Funding acquisition. All authors approved the version to be published.

## **8. Acknowledgments**

We thank Auria Clinical Informatics for assisting in data collection. All authors declare that they have no conflicts of interest.

## **9. Sources of Funding**

This study was supported by Maire Taponen foundation (Dr. Laukka), Finnish culture foundation; Varsinais-Suomen fund (grant number 85161416) and Satakunta fund (grant numbers 75212239, 75221501) (Dr Hakovirta), a government research grant awarded to Turku University Hospital (Dr. Laukka, Dr Hakovirta and Dr. Rinne) and a government research grant awarded to Satasairaala (Pori) (Dr Hakovirta).

## **10. Disclosures**

The authors have no personal, financial, or institutional interest in any of the drugs, materials, or devices described in this article.



## 11. References

1. Vlak MH, Algra A, Brandenburg R, Rinkel GJ. Prevalence of unruptured intracranial aneurysms, with emphasis on sex, age, comorbidity, country, and time period: a systematic review and meta-analysis. *Lancet Neurol*. 2011;10(7):626-636. doi:10.1016/S1474-4422(11)70109-0
2. Etminan N, Chang HS, Hackenberg K, et al. Worldwide Incidence of Aneurysmal Subarachnoid Hemorrhage According to Region, Time Period, Blood Pressure, and Smoking Prevalence in the Population: A Systematic Review and Meta-analysis. *JAMA Neurol*. 2019;76(5):588-597. doi:10.1001/jamaneurol.2019.0006
3. Vlak MH, Rinkel GJ, Greebe P, Algra A. Independent risk factors for intracranial aneurysms and their joint effect: a case-control study. *Stroke*. 2013;44(4):984-987. doi:10.1161/STROKEAHA.111.000329
4. Karhunen V, Bakker MK, Ruigrok YM, Gill D, Larsson SC. Modifiable Risk Factors for Intracranial Aneurysm and Aneurysmal Subarachnoid Hemorrhage: A Mendelian Randomization Study. *J Am Heart Assoc*. 2021;10(22):e022277. doi:10.1161/JAHA.121.022277
5. Cho BH, Kim JH, Suh SH, et al. Characteristics of Intracranial Aneurysms According to Levels of Coronary Artery Calcium. *Stroke*. 2019;50(6):1403-1408.
6. Rantasalo V, Gunn J, Kiviniemi T, et al. Intracranial aneurysm is predicted by abdominal aortic calcification index: A retrospective case-control study. *Atherosclerosis*. 2021;334:30-38. doi:10.1016/j.atherosclerosis.2021.08.027
7. Huhtakangas J, Lehto H, Seppä K, et al. Long-Term Excess Mortality After Aneurysmal Subarachnoid Hemorrhage: Patients With Multiple Aneurysms at Risk. *Stroke*. 2015;46(7):1813-1818. doi:10.1161/STROKEAHA.115.009288
8. Uehara T, Tabuchi M, Mori E. High frequency of unruptured intracranial aneurysms in female patients with ischaemic heart disease. *J Neurol Neurosurg Psychiatry*. 1998;64(4):536-538. doi:10.1136/jnnp.64.4.536
9. Gerhard-Herman MD, Gornik HL, Barrett C, et al. 2016 AHA/ACC Guideline on the Management of Patients With Lower Extremity Peripheral Artery Disease: Executive Summary: A Report of the American College of Cardiology/American Heart Association Task Force on Clinical Practice Guidelines [published correction appears in *Circulation*. 2017 Mar 21;135(12 ):e790]. *Circulation*. 2017;135(12):e686-e725. doi:10.1161/CIR.0000000000000470
10. Diehm C, Allenberg JR, Pittrow D, et al. Mortality and vascular morbidity in older adults with asymptomatic versus symptomatic peripheral artery disease. *Circulation*. 2009;120(21):2053-2061. doi:10.1161/CIRCULATIONAHA.109.865600
11. Wang FM, Yang C, Ballew SH, et al. Ankle-brachial index and subsequent risk of incident and recurrent cardiovascular events in older adults: The Atherosclerosis Risk in Communities (ARIC) study. *Atherosclerosis*. 2021;336:39-47
12. Stone K, Fryer S, Faulkner J, et al. Associations of lower-limb atherosclerosis and arteriosclerosis with cardiovascular risk factors and disease in older adults: The Atherosclerosis Risk in Communities (ARIC) study. *Atherosclerosis*. 2022;340:53-60. doi:10.1016/j.atherosclerosis.2021.10.014

13. Giugliano G, Laurenzano E, Rengo C, et al. Abdominal aortic aneurysm in patients affected by intermittent claudication: prevalence and clinical predictors. *BMC Surg.* 2012;12 Suppl 1(Suppl 1):S17. doi:10.1186/1471-2482-12-S1-S17
14. Hicks CW, Al-Qunaibet A, Ding N, et al. Symptomatic and asymptomatic peripheral artery disease and the risk of abdominal aortic aneurysm: The Atherosclerosis Risk in Communities (ARIC) study. *Atherosclerosis.* 2021;333:32-38. doi:10.1016/j.atherosclerosis.2021.08.016
15. Song J, Lim YC, Ko I, Kim JY, Kim DK. Prevalence of Intracranial Aneurysm in Patients With Aortic Disease in Korea: A Nationwide Population-Based Study. *J Am Heart Assoc.* 2021;10(6):e019009. doi:10.1161/JAHA.120.019009
16. Laukka D, Pan E, Fordell T, et al. Prevalence of thoracic aortic aneurysms and dilatations in patients with intracranial aneurysms. *J Vasc Surg.* 2019;70(6):1801-1808. doi:10.1016/j.jvs.2019.01.066
17. Bouthillier A, van Loveren HR, Keller JT. Segments of the internal carotid artery: a new classification. *Neurosurgery.* 1996;38(3):425-433. doi:10.1097/00006123-199603000-00001
18. Thompson BG, Brown RD Jr, Amin-Hanjani S, et al. Guidelines for the Management of Patients With Unruptured Intracranial Aneurysms: A Guideline for Healthcare Professionals From the American Heart Association/American Stroke Association. *Stroke.* 2015;46(8):2368-2400. doi:10.1161/STR.0000000000000070
19. Huhtakangas J, Numminen J, Pekkola J, Niemelä M, Korja M. Screening of unruptured intracranial aneurysms in 50 to 60-year-old female smokers: a pilot study. *Sci Rep.* 2021;11(1):23729. Published 2021 Dec 9. doi:10.1038/s41598-021-02963-z
20. Ogilvy CS, Gomez-Paz S, Kicielinski KP, et al. Women With First-Hand Tobacco Smoke Exposure Have a Higher Likelihood of Having an Unruptured Intracranial Aneurysm Than Nonsmokers: A Nested Case-Control Study. *Neurosurgery.* 2020;87(6):1191-1198. doi:10.1093/neuros/nyaa227
21. Resnick HE, Lindsay RS, McDermott MM, et al. Relationship of high and low ankle brachial index to all-cause and cardiovascular disease mortality: the Strong Heart Study. *Circulation.* 2004;109(6):733-739. doi:10.1161/01.CIR.0000112642.63927.54
22. Ankle Brachial Index Collaboration, Fowkes FG, Murray GD, et al. Ankle brachial index combined with Framingham Risk Score to predict cardiovascular events and mortality: a meta-analysis. *JAMA.* 2008;300(2):197-208. doi:10.1001/jama.300.2.197
23. Criqui MH, McClelland RL, McDermott MM, et al. The ankle-brachial index and incident cardiovascular events in the MESA (Multi-Ethnic Study of Atherosclerosis). *J Am Coll Cardiol.* 2010;56(18):1506-1512. doi:10.1016/j.jacc.2010.04.060
24. Allison MA, Laughlin GA, Barrett-Connor E, Langer R. Association between the ankle-brachial index and future coronary calcium (the Rancho Bernardo study). *Am J Cardiol.* 2006;97(2):181-186. doi:10.1016/j.amjcard.2005.08.019
25. Tullos BW, Sung JH, Lee JE, Criqui MH, Mitchell ME, Taylor HA. Ankle-brachial index (ABI), abdominal aortic calcification (AAC), and coronary artery calcification (CAC): the Jackson heart study. *Int J Cardiovasc Imaging.* 2013;29(4):891-897. doi:10.1007/s10554-012-0145-y
26. Song P, Rudan D, Zhu Y, et al. Global, regional, and national prevalence and risk factors for peripheral artery disease in 2015: an updated systematic review and analysis. *Lancet Glob Health.* 2019;7(8):e1020-e1030. doi:10.1016/S2214-109X(19)30255-4
27. Aboyans V, Criqui MH, Abraham P, et al. Measurement and interpretation of the ankle-brachial index: a scientific statement from the American Heart Association [published

- correction appears in *Circulation*. 2013 Jan 1;127(1):e264]. *Circulation*. 2012;126(24):2890-2909. doi:10.1161/CIR.0b013e318276fbc
28. Brevetti G, Giugliano G, Brevetti L, Hiatt WR. Inflammation in peripheral artery disease. *Circulation*. 2010;122(18):1862-1875. doi:10.1161/CIRCULATIONAHA.109.918417
29. Frösen J, Tulamo R, Paetau A, et al. Saccular intracranial aneurysm: pathology and mechanisms. *Acta Neuropathol*. 2012;123(6):773-786. doi:10.1007/s00401-011-0939-3
30. Mannino DM, Buist AS. Global burden of COPD: risk factors, prevalence, and future trends. *Lancet*. 2007;370(9589):765-773. doi:10.1016/S0140-6736(07)61380-4

**Table 1.** Comparison of baseline and intracranial aneurysm (IA) characteristics according to the ABI group. Bold indicate statistically significant value  $p < 0.05$ .

| <b>Baseline characteristics</b>                          | <b>Normal ABI<br/>(1.0-1.4)<br/><i>n</i> = 208</b> | <b>Low ABI<br/>(≤0.9)<br/><i>n</i> = 464</b> | <b>Borderline ABI<br/>(0.91-0.99)<br/><i>n</i> = 47</b> | <b>High ABI<br/>(&gt;1.4)<br/><i>n</i> = 57</b> | <b>P-<br/>value</b> |
|----------------------------------------------------------|----------------------------------------------------|----------------------------------------------|---------------------------------------------------------|-------------------------------------------------|---------------------|
| Mean age at ABI measurement, years, SD                   | 67.0 ± 10.8                                        | 69.8 ± 9.6                                   | 66.1 ± 13.1                                             | 68.3 ± 11.5                                     | <b>0.003</b>        |
| Mean age at cerebrovascular imaging, years, SD           | 69.4 ± 11.9                                        | 72.2 ± 10.0                                  | 68.6 ± 14.2                                             | 68.0 ± 12.6                                     | <b>0.010</b>        |
| Sex (female) (%)                                         | 39.4%                                              | 38.4%                                        | 53.2%                                                   | 22.8%                                           | <b>0.016</b>        |
| <b>Comorbidities</b>                                     |                                                    |                                              |                                                         |                                                 |                     |
| Hypertension (%)                                         | 60.1%                                              | 66.0%                                        | 59.6%                                                   | 75.4%                                           | 0.129               |
| Diabetes type 1 or 2 (%)                                 | 35.1%                                              | 36.9%                                        | 46.8%                                                   | 63.2%                                           | <b>&lt;0.001</b>    |
| <i>Diabetes type 1 (%)</i>                               | 7.2%                                               | 3.9%                                         | 19.2%                                                   | 15.8%                                           | <b>&lt;0.001</b>    |
| <i>Diabetes type 2 (%)</i>                               | 27.9%                                              | 33.3%                                        | 25.5%                                                   | 50.9%                                           | <b>0.008</b>        |
| Hypercholesterolemia (%)                                 | 24.0%                                              | 30.5%                                        | 27.7%                                                   | 36.8%                                           | 0.19                |
| Coronary artery disease (%)                              | 29.8%                                              | 36.0%                                        | 34.0%                                                   | 42.1%                                           | 0.27                |
| Chronic heart failure (%)                                | 13.9%                                              | 16.4%                                        | 21.3%                                                   | 28.1%                                           | 0.069               |
| Atrial fibrillation                                      | 26.0%                                              | 19.4%                                        | 29.8%                                                   | 36.8%                                           | <b>0.008</b>        |
| Chronic kidney failure (%)                               | 10.6%                                              | 11.9%                                        | 19.2%                                                   | 33.3%                                           | <b>&lt;0.001</b>    |
| Chronic obstructive pulmonary disease (%)                | 6.3%                                               | 14.7%                                        | 12.8%                                                   | 14.0%                                           | <b>0.022</b>        |
| Rheumatoid disease                                       | 11.1%                                              | 7.3%                                         | 6.4%                                                    | 10.5%                                           | 0.371               |
| Varicose_ulcus                                           | 7.2%                                               | 5.6%                                         | 8.5%                                                    | 14.0%                                           | 0.112               |
| Malignancy                                               | 17.8%                                              | 19.4%                                        | 12.8%                                                   | 31.6%                                           | 0.070               |
| <b>Intracranial aneurysm characteristics</b>             |                                                    |                                              |                                                         |                                                 |                     |
| Prevalence of intracranial aneurysm, total, <i>n</i> (%) | 5 (2.4%)                                           | 94 (20.3%)                                   | 7 (14.9%)                                               | 4 (7.0%)                                        | <b>&lt;0.001</b>    |
| <i>Unruptured, n (%)</i>                                 | 4 (1.9%)                                           | 84 (18.1%)                                   | 6 (12.8%)                                               | 3 (5.3%)                                        | <b>&lt;0.001</b>    |
| <i>Ruptured, n (%)</i>                                   | 1 (0.5%)                                           | 10 (2.2%)                                    | 1 (2.1%)                                                | 1 (1.7%)                                        | 0.277               |
| Median size of the largest IA, mm (IQR)                  | 4.0 (3.0-5.0)                                      | 4.0 (3.0-5.0)                                | 3.0 (3.0-8.0)                                           | 4.0 (3.0-7.0)                                   | 0.929               |
| Distribution of largest IA                               |                                                    |                                              |                                                         |                                                 | 0.817               |
| <i>Anterior cerebral artery</i>                          | 20.0%                                              | 25.8%                                        | 28.6%                                                   | 50.0%                                           |                     |
| <i>Internal Carotid Artery</i>                           | 60.0%                                              | 31.2%                                        | 14.3%                                                   | 25.0%                                           |                     |
| <i>Middle Cerebral Artery</i>                            | 20.0%                                              | 21.5%                                        | 28.6%                                                   | 0%                                              |                     |
| <i>Posterior Circulation</i>                             | 0%                                                 | 8.6%                                         | 28.6%                                                   | 0%                                              |                     |
| <i>Intracavernous Internal Carotid Artery</i>            | 0%                                                 | 12.9%                                        | 0%                                                      | 25.0%                                           |                     |

**Table 2.** Baseline characteristics of unruptured and ruptured intracranial aneurysms (IA) and patients without IAs. Bold indicate statistically significant value  $p < 0.05$ .

|                                       | <b>Unruptured IA<br/>n= 97</b> | <b>Ruptured IA<br/>n= 13</b> | <b>Without IA<br/>n= 666</b> | <b>p-value</b>   |
|---------------------------------------|--------------------------------|------------------------------|------------------------------|------------------|
| Age, years, mean (SD)                 | 69.5 (8.7)                     | 68.9 (8.9)                   | 68.6 (10.6)                  | 0.753            |
| Sex (male) (%)                        | 56.7%                          | 53.9%                        | 62.5%                        | 0.467            |
| Hypertension (%)                      | 68.0%                          | 76.9%                        | 64.0%                        | 0.477            |
| Diabetes type 1 or 2 (%)              | 39.2%                          | 15.4%                        | 39.4%                        | 0.213            |
| <i>Diabetes type 1 (%)</i>            | 5.2%                           | 0%                           | 6.9%                         | 0.508            |
| <i>Diabetes type 2 (%)</i>            | 34.0%                          | 15.4%                        | 32.8%                        | 0.396            |
| Hypercholesterolemia (%)              | 34.0%                          | 30.8%                        | 28.3%                        | 0.508            |
| Coronary artery disease (%)           | 29.9%                          | 7.7%                         | 35.9%                        | 0.061            |
| Chronic heart failure (%)             | 19.6%                          | 0.0%                         | 16.8%                        | 0.207            |
| Atrial fibrillation                   | 16.5%                          | 7.7%                         | 24.3%                        | 0.096            |
| Chronic kidney failure (%)            | 15.5%                          | 15.4%                        | 13.2%                        | 0.820            |
| Chronic obstructive pulmonary disease | 18.6%                          | 7.7%                         | 11.4%                        | 0.118            |
| Rheumatoid disease                    | 6.2%                           | 23.1%                        | 8.6%                         | 0.121            |
| Varicose ulcer                        | 6.2%                           | 23.1%                        | 6.6%                         | 0.064            |
| Malignancy                            | 17.5%                          | 7.7%                         | 20.0%                        | 0.475            |
| ABI, median (IQR)                     | 0.59 (0.45-0.75)               | 0.57 (0.51-0.79)             | 0.80 (0.53-1.13)             | <b>&lt;0.001</b> |

**Table 3.** Multinomial regression models for unruptured intracranial aneurysms adjusted with sex- and age. In Model 1 clinically significant variables and in Model 2 variables that were statistically significant in the univariate analysis. Bold indicate statistically significant value  $p < 0.05$ .

| Variable                              | Odds ratio | 95% CI     | p Value          |
|---------------------------------------|------------|------------|------------------|
| <u>Model 1</u>                        |            |            |                  |
| Age                                   | 1.00       | 0.98-1.02  | 0.946            |
| Sex (female vs. male)                 | 1.27       | 0.80-1.99  | 0.309            |
| Hypertension                          | 1.17       | 0.72-1.90  | 0.516            |
| Coronary artery disease               | 0.68       | 0.42-1.11  | 0.120            |
| Chronic obstructive pulmonary disease | 1.52       | 0.84-2.72  | 0.163            |
| Chronic kidney failure                | 1.33       | 0.71-2.52  | 0.376            |
| Normal ABI 0.9-1.4                    | ref.       |            |                  |
| Low ABI $\leq 0.9$                    | 11.33      | 4.08-31.51 | <b>&lt;0.001</b> |
| Borderline ABI                        | 7.13       | 1.91-26.63 | <b>0.004</b>     |
| High ABI $> 1.4$                      | 2.73       | 0.58-12.74 | 0.473            |
| <u>Model 2</u>                        |            |            |                  |
| Age                                   | 0.99       | 0.98-1.02  | 0.951            |
| Sex (female vs. male)                 | 1.28       | 0.82-1.99  | 0.286            |
| Normal ABI 0.9-1.4                    | ref.       |            |                  |
| Low ABI $\leq 0.9$                    | 11.60      | 4.18-32.17 | <b>&lt;0.001</b> |
| Borderline ABI                        | 7.38       | 1.99-27.95 | <b>0.003</b>     |
| High ABI $> 1.4$                      | 3.00       | 0.65-13.84 | 0.160            |

**Table 4.** Risk factors for Low ABI ( $\leq 0.9$ ), Borderline ABI (0.91-0.99), and High ABI ( $> 1.4$ ) compared to normal ABI (1.0-1.4). Model included variables that were statistically significant in univariate analysis. Values are odds ratios (95% CI). Bold indicate statistically significant value  $p < 0.05$ .

| <b>Variable</b>                       | <b>Low ABI</b>          | <b>Borderline ABI</b>   | <b>High ABI</b>         |
|---------------------------------------|-------------------------|-------------------------|-------------------------|
| Age                                   | <b>1.03 (1.02-1.05)</b> | 0.99 (0.96-1.02)        | 1.02 (0.99-1.05)        |
| Sex (female vs. male)                 | 0.99 (0.70-1.40)        | <b>1.95 (1.02-3.73)</b> | 0.53 (0.26-1.06)        |
| Diabetes type 1 or 2                  | 1.17 (0.81-1.68)        | 1.58 (0.81-1.68)        | <b>2.41 (1.26-4.61)</b> |
| Atrial fibrillation                   | <b>0.53 (0.35-0.80)</b> | 1.26 (0.60-2.66)        | 1.46 (0.75-2.86)        |
| Chronic kidney failure                | 1.18 (0.68-2.05)        | 1.58 (0.81-3.10)        | <b>3.29 (1.55-6.96)</b> |
| Chronic obstructive pulmonary disease | <b>2.68 (1.43-5.01)</b> | 2.45 (0.87-6.92)        | 2.86 (0.87-5.98)        |

**Figure 1.** Prevalence of unruptured and ruptured intracranial aneurysms by ankle-brachial index group.

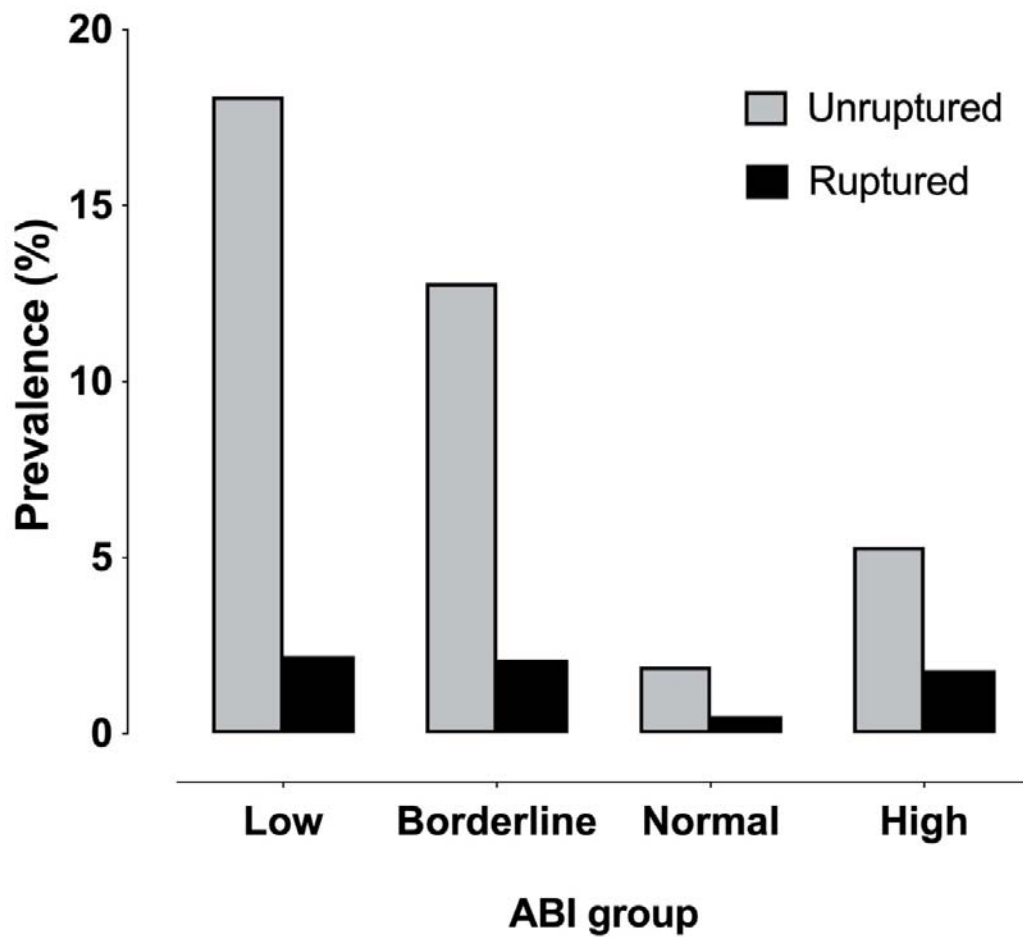

Source: https://medrxiv.org/content/10.1101/2023.07.11.23292533v2.full.pdf
